# Supplementary material
Source: publisher site journal article supplement (https://www.dovepress.com/article/577871)

**Supplementary Figures**

figure legends:

**Supplementary Fig 1. Path diagram of the mediation analysis of NLR on the relationship between DST and UL.** The arrows indicate the direction of the hypothesized effects (paths). The numbers adjacent to the arrows represent the effect estimates (coefficients) and their statistical significance.


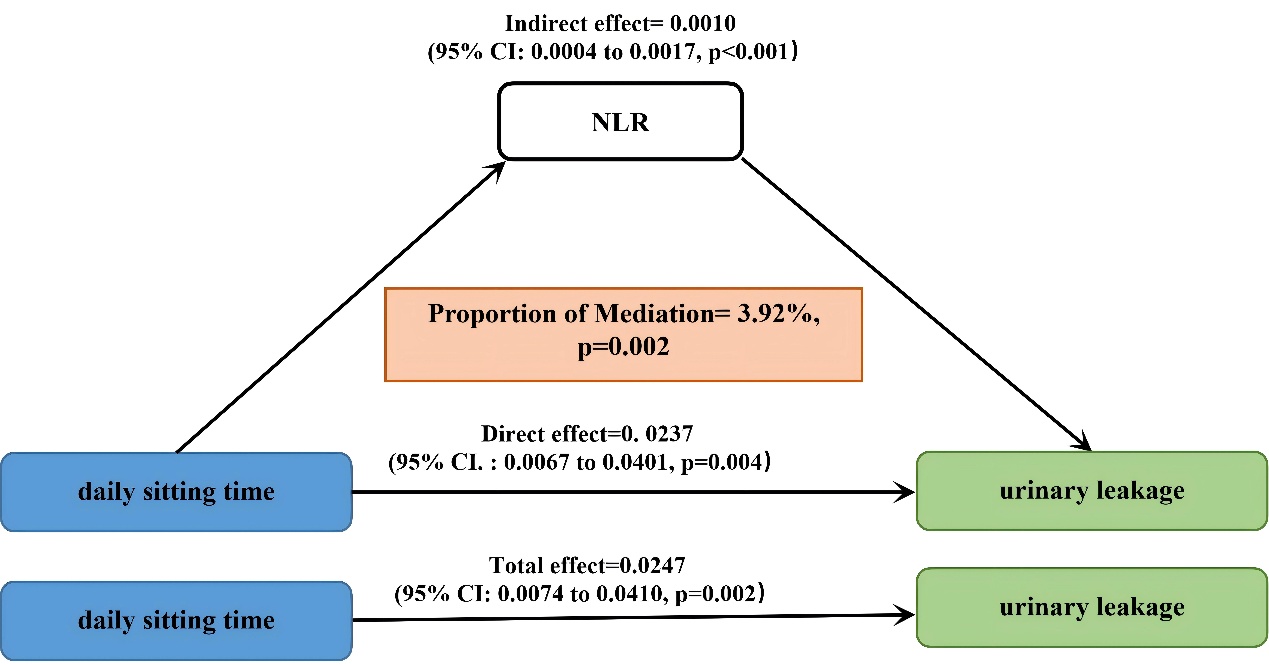


**Supplementary Fig 2. RCS revealed the association between BMI and the risk of UL caused by sedentary behavior.** The solid red line represents the estimated Odds Ratio (OR), and the pink shaded area indicates the 95% Confidence Interval (CI). The horizontal dashed line represents the reference risk (OR = 1.0). The vertical lines indicate the knot locations. The histograms in the background represent the distribution density of the participants for each variable.


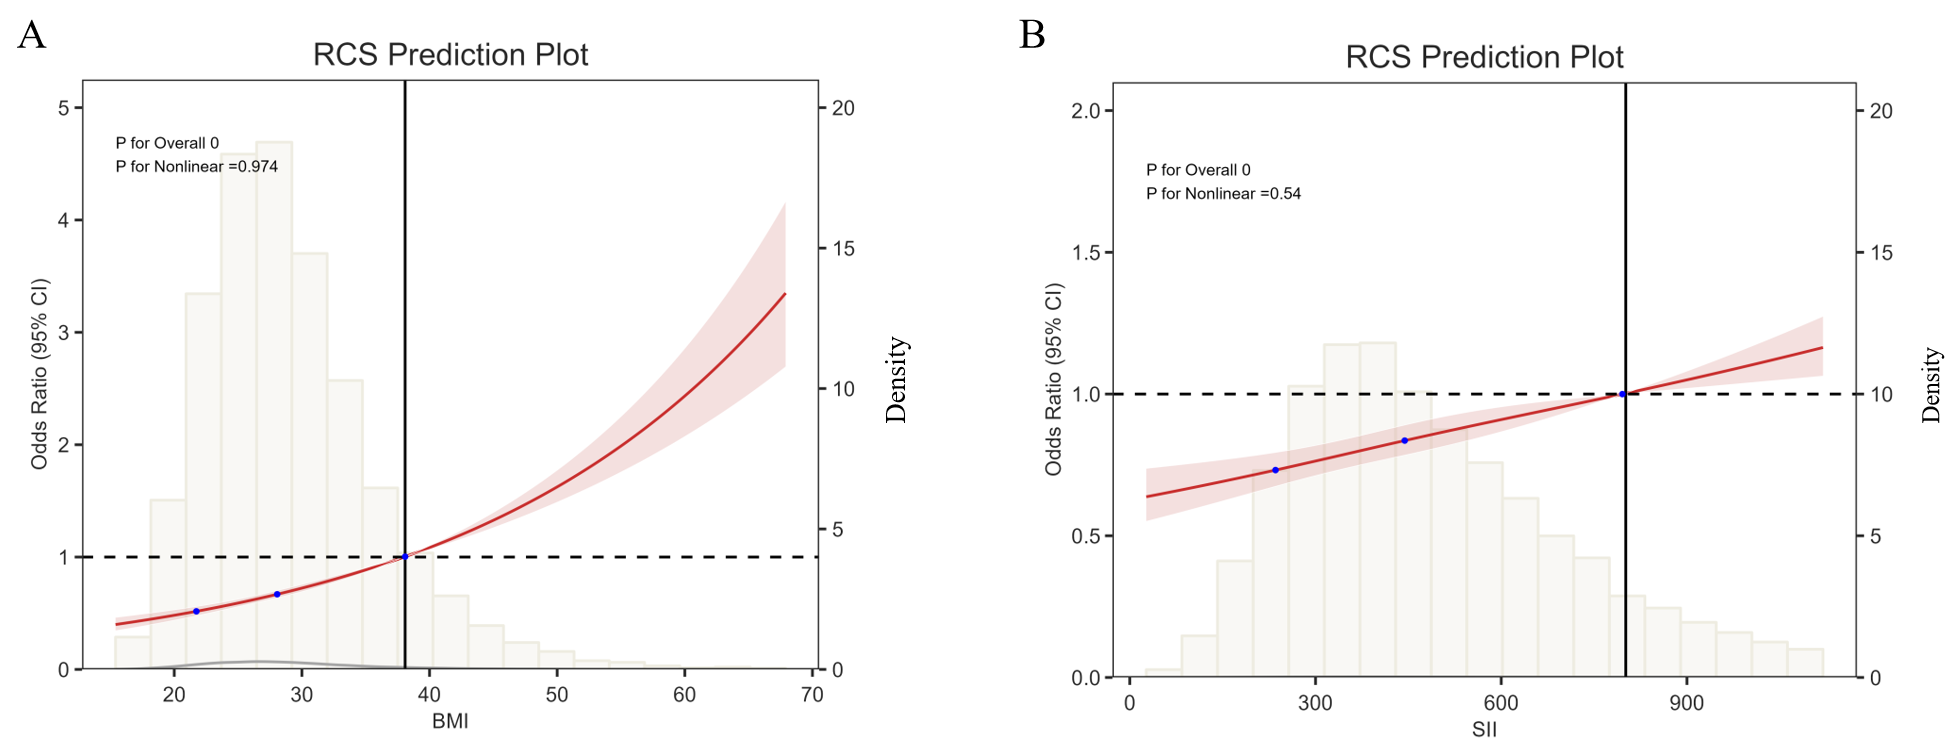

Supplement: Supplementary file 1 [file 577871_Supplementary%20Material_for_corrections%20_1%20CLEAN.docx]
